# Supplementary material for: The Effect of Dietary Phospholipids on the Ultrastructure and Function of Intestinal Epithelial Cells
Source: MDPI journal article supplement (doi:10.3390/ijms24021788), 2023-01-16
Supplement: s1 [file s1]

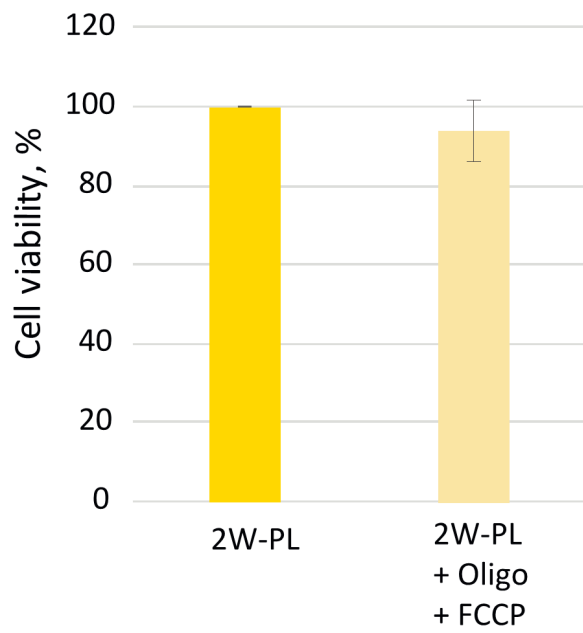

Figure S1: Cell viability assessment by trypan blue staining in live crypts upon sequential addition of oligomycin and FCCP. Untreated cell viability in each sample was taken as 100%. N = 5 in treated and untreated groups. No significant effect of treatment was found.
